# Supplementary material
Source: Springer Nature journal article supplement (https://www.springermedizin.de/resource/supplementary/12874_2012_917_MOESM6_ESM.pdf/9433150)

Elements from models of health behaviour change

New elements specific to the workplace setting

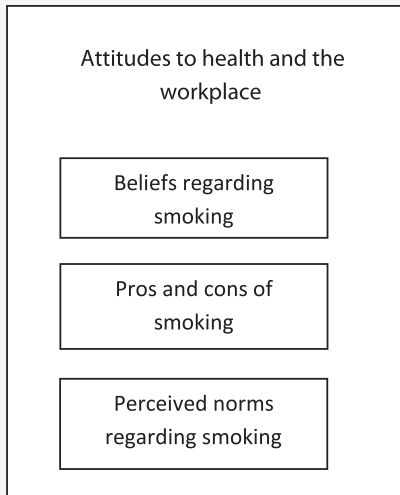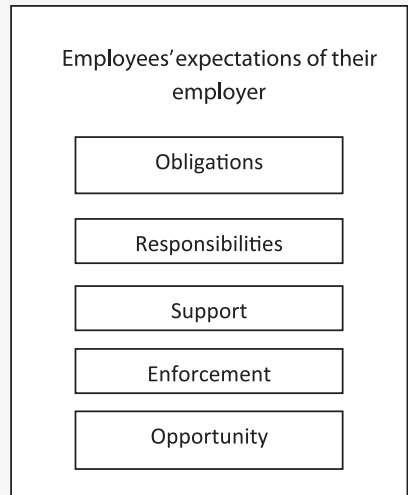

Employer complies with, permits or supports an intervention

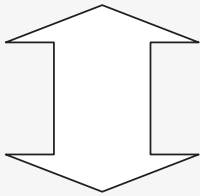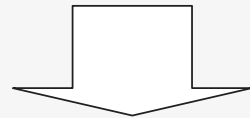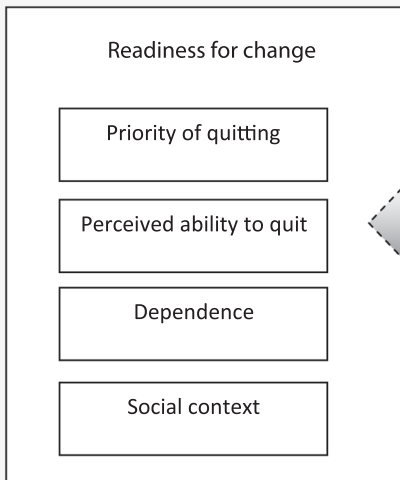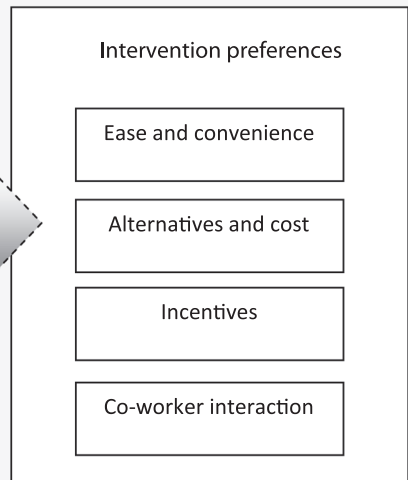

Supplement: MOESM6 [file 9433150]
